# Supplementary material for: Characterisation of class VI TRIM RING domains: linking RING activity to C-terminal domain identity
Source: PubMed Central journal article supplement (PMC6487577; doi:10.26508/lsa.201900295), 2019-04-26

Figure 3 Source data

3D

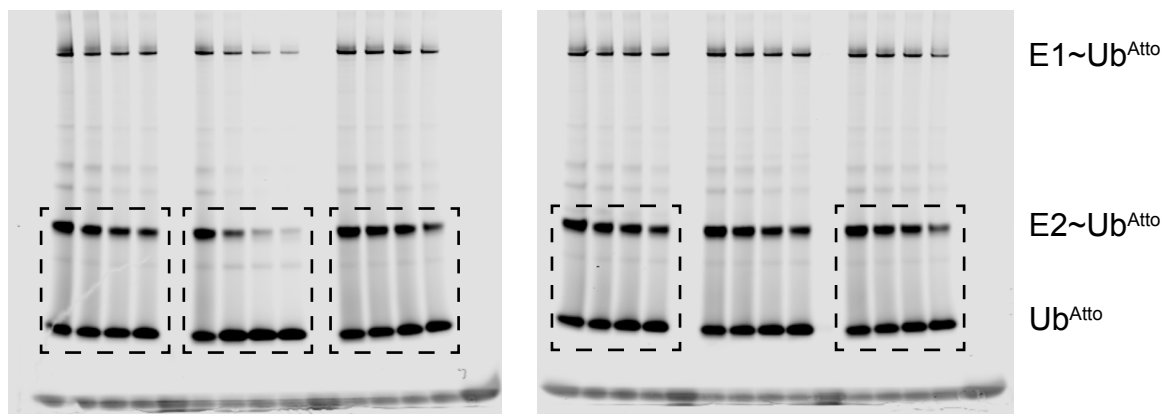

3F

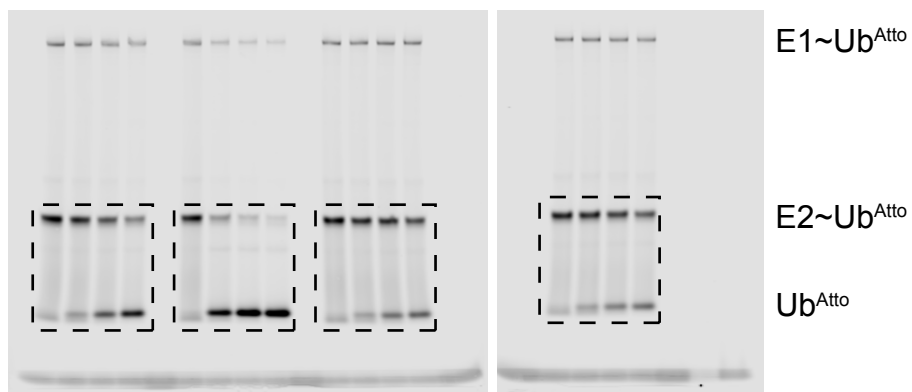

Supplement: LSA-2019-00295_SdataF3.pdf [file LSA-2019-00295_SdataF3.pdf]
